# Supplementary material for: Ionic contrast across a lipid membrane for Debye length extension: towards an ultimate bioelectronic transducer
Source: PubMed Central journal article supplement (PMC8213817; doi:10.1038/s41467-021-24122-8), 2021-06-18
Supplement: 41467_2021_24122_MOESM1_ESM.pdf [file 41467_2021_24122_MOESM1_ESM.pdf]

1 **Supplementary Information for**

2

3 **Ionic contrast across a lipid membrane for Debye length extension**

4 **: towards an ultimate bioelectronic transducer**

5 Donggeun Lee<sup>1,2,†</sup>, Woo Hyuk Jung<sup>3,†</sup>, Suho Lee<sup>4</sup>, Eui-Sang Yu<sup>1</sup>, Taikjin Lee<sup>1</sup>, Jae Hun  
6 Kim<sup>1</sup>, Hyun Seok Song<sup>1</sup>, Kwan Hyi Lee<sup>5,6</sup>, Seok Lee<sup>1</sup>, Sang-Kook Han<sup>2</sup>, Myung Chul  
7 Choi<sup>4</sup>, Dong June Ahn<sup>3,6,\*</sup>, Yong-Sang Ryu<sup>1,6,\*</sup>, and Chulki Kim<sup>1,\*</sup>

8

9 <sup>1</sup>Sensor System Research Center, Korea Institute of Science and Technology, Seoul 02792, Republic of  
10 Korea.

11 <sup>2</sup>Department of Electrical & Electronic Engineering, Yonsei University, Seoul 03722, Republic of Korea.

12 <sup>3</sup>Department of Chemical and Biological Engineering, Korea University, Seoul 02841, Korea.

13 <sup>4</sup>Department of Bio and Brain Engineering, Korea Advanced Institute of Science and Technology  
14 (KAIST), Daejeon 34141, Republic of Korea.

15 <sup>5</sup>Center for Biomaterials, Korea Institute of Science and Technology, Seoul 02792, Republic of Korea.

16 <sup>6</sup>KU-KIST Graduate School of Converging Science and Technology, Korea University, Seoul 02841,  
17 Korea.

18 <sup>†</sup>These authors contributed equally: Donggeun Lee and Woo Hyuk Jung.

19 <sup>\*</sup>These authors jointly supervised this work: Dong June Ahn, Yong-Sang Ryu, and Chulki kim.

20 <sup>\*</sup>Correspondence to: [ahn@korea.ac.kr](mailto:ahn@korea.ac.kr), [ysryu82@kist.re.kr](mailto:ysryu82@kist.re.kr), and [chulki.kim@kist.re.kr](mailto:chulki.kim@kist.re.kr).

21

22  
23  
24  
25  
26  
27  
28  
29  
30  
31  
32  
33  
34  
35  
36  
37  
38  
39

**This file contains following information:**

**Supplementary Notes**

1. Device fabrication and measurement setup (Supplementary Figs. 1-3, and Eq. 1)
2. Lipid preparation and FL measurement
3. Buffer solution exchange (Supplementary Fig. 4)
4. Control experiment with identical ionic conditions across the SLB (Supplementary Figs. 5-6)
5. Minimum molecular mass for the full coverage of the SLB (Supplementary Eqs. 2-4)
6. Langmuir–Nernst isotherm model considering nonspecific bindings (Supplementary Eq. 5)
7. Sensing mechanism and analytical models (Supplementary Eqs. 6-11, Fig. 7, and Table 1)
8. X-ray reflectivity measurement for electron density fitting (Supplementary Figs. 8-9)
9. Chemical potential calculation using the electron density (Supplementary Eqs. 12-13, Table 2)
10. Comparison of lipid membranes on a hydrophilic polymer layer vs a SiO<sub>2</sub> layer  
(Supplementary Fig. 10)
11. Molecular dynamics (MD) simulation for investigating the conformational change  
(Supplementary Fig. 11-12)

**Supplementary References**

40 **Supplementary Note 1. Device fabrication and measurement setup**

41

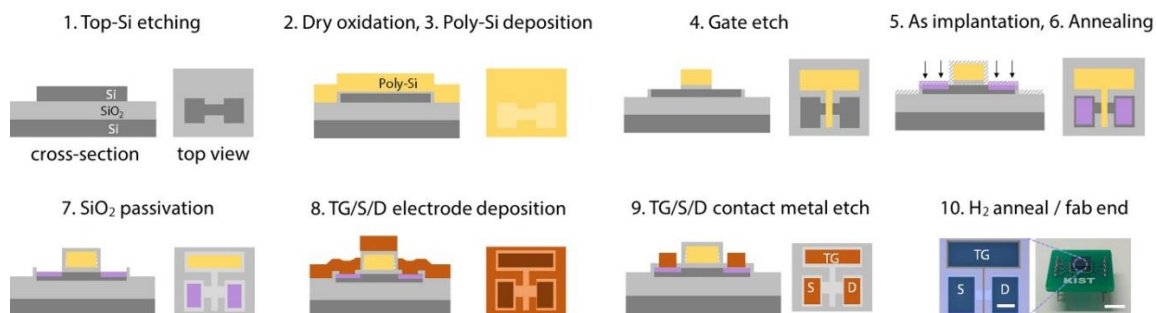

42

43 **Supplementary Fig. 1.** Schematic representation of fabrication of FETs for molecular detection

44

45 **Extended gate (EG) fabrication:** The top gate electrode of the FET is wired to an indium tin  
46 oxide (ITO, thickness: 300 nm and resistivity: 5  $\Omega$ /sq) electrode. A 80-nm-thick SiO<sub>2</sub> layer was  
47 deposited on the ITO for bonding the reaction chamber to the ITO electrode. The reaction chamber  
48 was made of polydimethylsiloxane (PDMS, Sylgard 184 silicon elastomer kit, Dow Corning). The  
49 PDMS mixture (base:curing agent = 10:1) was poured into a Petridish and baked for 12 h at 80°C.  
50 After curing, an 8-mm diameter and a 5-mm height hole was formed in the PDMS mold using a  
51 biopsy punch. Note that the SiO<sub>2</sub> layer plays a bifunctional role here: (1) a surface for forming the  
52 supported lipid bilayer (SLB) membrane and (2) serving as a hydrophilic polar silanol (Si-OH)  
53 group cross-linked surface for the PDMS chamber via covalent bonding after an oxygen plasma  
54 treatment<sup>1</sup>.

55

56 **Importance of disposable EG:** The EG reaction chamber is disposable. This measurement  
57 configuration for the EG and the remotely packaged FET allows for reliable data acquisition,  
58 eliminating any possible contamination or damage to the active current channel upon direct  
59 exposure to target analytes in ionic solution. Moreover, direct comparison between measurements  
60 is possible because an identical FET transduces signals from the disposable EG. This is important  
61 during quantification of analyte concentration.

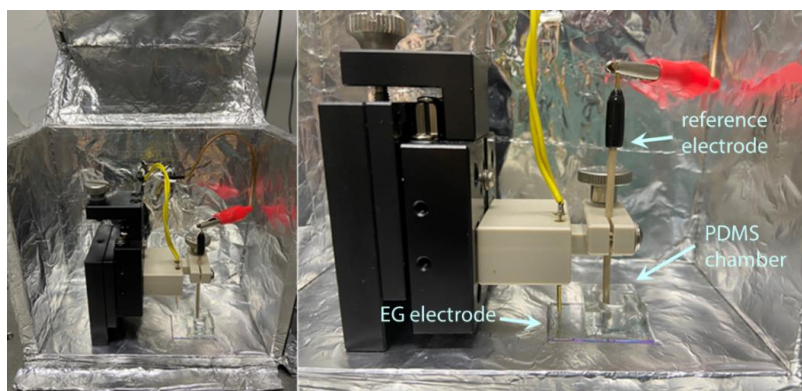

62  
63 **Supplementary Fig. 2.** Photograph images of the EG with the reaction chamber placed in a  
64 Faraday shielding box

65

66 **Back gate bias voltage conditions:** In our measurement configuration, the potential variation  
67 ( $\Delta\psi$ ) of the sensing probe (EG) is capacitively coupled to top gate voltage ( $V_{TG}$ ), modulating drain  
68 current ( $I_D$ ) in the FET. The proportionality between the variations of  $V_{TG}$  and  $I_D$  is defined by  
69 transconductance ( $g_m$ ),

$$76 \quad g_{m,\max} = g_m|_{V_{TG}=V_{th}} = \frac{dI_D}{dV_{TG}} \quad (1)$$

70 where  $dI_D$  and  $dV_{TG}$  are the small variation of the drain current and the top gate voltage. As seen  
71 in the Supplementary Eq. 1, the  $g_m$  represents the amplification of the output response in the  
72 transducing process from the molecular bindings. Namely, the  $dV_{TG}$  caused by the molecular  
73 binding is transduced into the obtained current variation  $dI_D$ . The  $g_m$  is typically maximized at  
74 around the threshold voltage  $V_{th}$ . However, this bias voltage condition to maximize the  $g_m$  is  
75 affected by the ionic strength of the analyte solution.

77 In our dual gate configuration, we can address this issue systematically by tuning back gate bias  
78 voltage  $V_{BG}$ . As shown in Supplementary Fig. 3, the threshold voltage ( $=g_{m,\max}$ ) can be shifted by  
79 the  $V_{BG}$ . Thus, we characterized the FET in the measurement condition to determine the back gate  
80 bias voltage for the maximized  $g_m$ . With this optimizing process, the applied  $g_m$  is ensured to be  
81 maximized throughout the measurements. For instance, the  $g_m$  was maximized with the  $V_{BG}$  of  
82 13.5 V in the DIW environment.

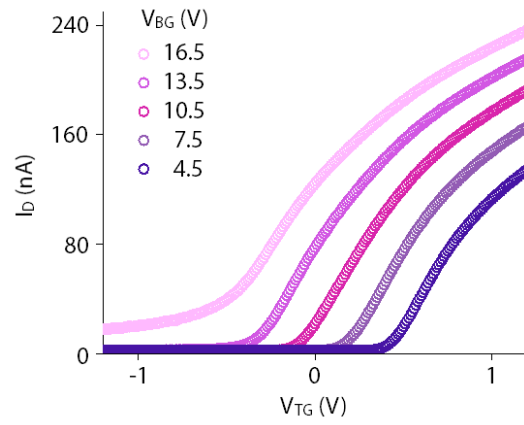

83

84 **Supplementary Fig. 3.**  $I_D$ - $V_{TG}$  curves at various back gate voltages  $V_{BG}$ . ( $V_S = 1$  V)

85

86 **Supplementary Note 2. Lipid preparation and fluorescence (FL) measurement**

87

88 **FL imaging and mobility test:** For the FL imaging, we monitored the SLB using an exposure  
89 time of 100 ms and gain 5.8× for every FL micrograph in the SLB coverage experiments. The FL  
90 and bright-field (BF) images of particulate materials were monitored using a FL microscopy  
91 system (LV100ND, Nikon) and then analyzed using image processing software (ImageJ, National  
92 Institutes of Health, USA). For the FRAP test, a 20- $\mu\text{m}$ -circle region of the SLB patch was  
93 bleached for 1 min, and time-lapse FL intensities were measured using confocal microscopes (C2  
94 C-ER, Nikon, Japan).

95

96

97 **Supplementary Note 3. Buffer solution exchange**

98

99 After the SLB (DOPC:B-PE = 95:5) preparation in DIW, half of the solution in the EG  
100 reaction chamber (50  $\mu\text{L}$  out of 100  $\mu\text{L}$ ) was exchanged with 50  $\mu\text{L}$  of 1 $\times$  PBS. This process was  
101 repeated until the  $V_{\text{TG}}$  value was saturated (Supplementary Fig. 4). Note that the signal reached a  
102 steady state after 10 repeated exchanges of the outer buffer (OB), which is consistent with the  
103 expected concentrations; 0.992 $\times$  PBS at the 7th buffer solution exchange and 0.999 $\times$  PBS at the  
104 10th buffer solution exchange (Supplementary Fig. 4).

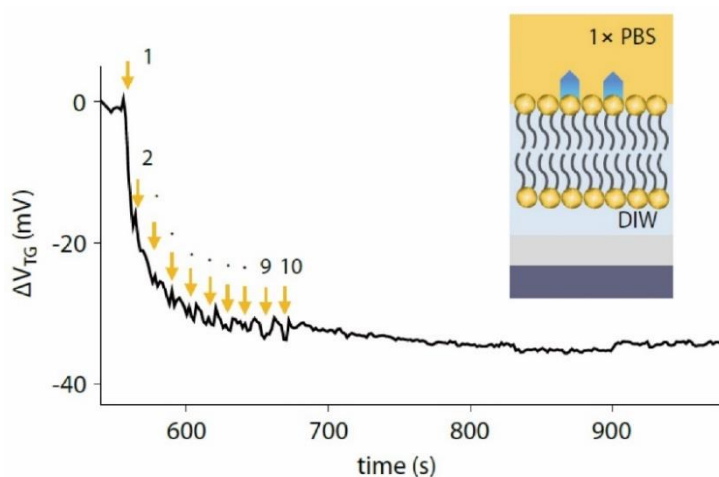

105

106 **Supplementary Fig. 4.** Potential variation of the top gate electrode during the OB exchange  
107 process with the ionic contrast across the SLB

108



109 **Supplementary Note 4. Control experiment with identical ionic conditions across the SLB**

110

111 To validate the role of the DIW layer between the SiO<sub>2</sub> surface and the SLB, a negative control  
112 experiment was carried out using symmetrical ionic conditions across the SLB. Namely, the SUV  
113 was prepared in 1× PBS (0.1 mg/mL) and exposed to the hydrophilic SiO<sub>2</sub> surface of the EG. After  
114 SLB formation (marker 2 in Supplementary Fig. 5), we waited for at least 5 min for signal  
115 stabilization. No signal change was observed after the 800 pM-avidin injection (marker 3 in  
116 Supplementary Fig. 5), in contrast to the recognizable  $\Delta V_{TG}$  changes under 800 pM-avidin  
117 bindings under asymmetric ionic conditions across the SLB (main manuscript Figs. 3a and h). This  
118 is attribute to the ultra-thin Debye length (approximately 0.74 nm in 1× PBS), which is thinner  
119 than IB layer (1–2 nm) between SLB and ITO surface.

120

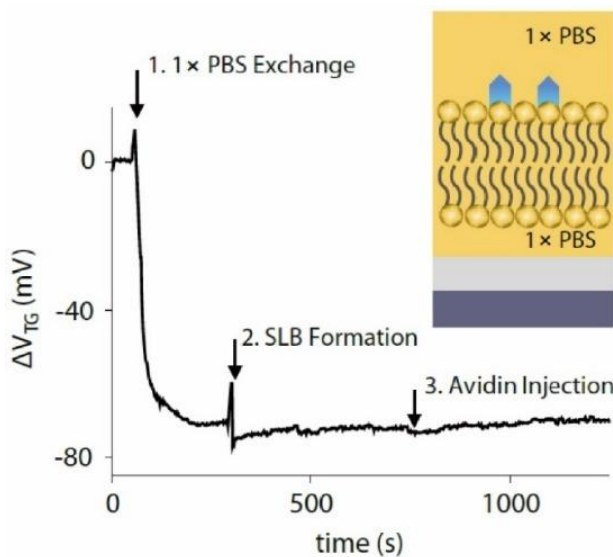

121

122 **Supplementary Fig. 5.** Real-time  $\Delta V_{TG}$  measurement of the response to biotin–avidin reactions  
123 under identical ionic conditions across the SLB

124

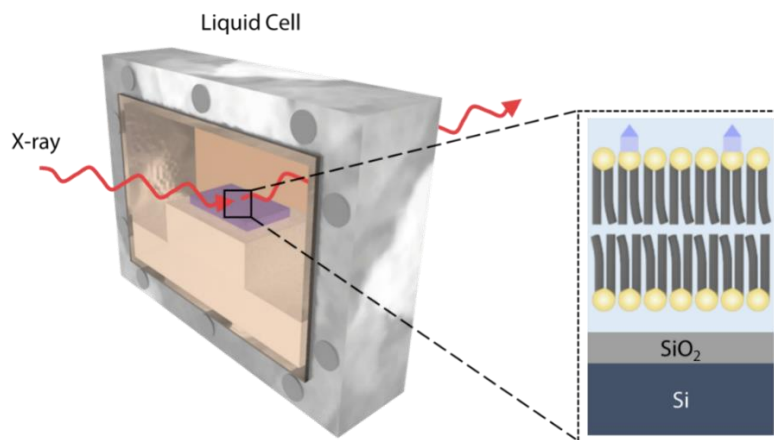

125

126 **Supplementary Fig. 6.** Representation of the liquid cell for X-ray reflectivity measurement and

127 the SLB on a SiO<sub>2</sub> wafer placed in the cell

128

129 **Supplementary Note 5. Minimum molecular mass for the full coverage of the SLB**

130

131 We estimated the required number of lipid molecules to cover the entire surface of the SiO<sub>2</sub>  
132 and the inside wall of the reaction chamber  $A_{EG}$ ,

133 
$$A_{EG} = \pi r^2 + 2\pi r h = 125.27 \text{ (mm}^2\text{)} \quad (2)$$

134 where  $r$  and  $h$  are the diameter and height of the EG chamber, respectively. Considering the head  
135 area of DOPC molecules<sup>2</sup> ( $A_{SLB} = 72.4 \text{ \AA}^2$ ), the required number of DOPC molecules was  
136 calculated to be

137 
$$\frac{A_{EG}}{A_{SLB}/2} = \frac{125.27 \text{ (mm}^2\text{)}}{36.2 \text{ (\AA)}} = 0.57 \times 10^{-9} \text{ (mol)}. \quad (3)$$

138 With an SLB composition of DOPC/B-PE = 95/5, the averaged mass of the SLB is

139 
$$\left( \underbrace{786.1 \times 0.95}_{DOPC} + \underbrace{1105.5 \times 0.05}_{B-PE} \right) (g \text{ mol}^{-1}) \times (0.57 \times 10^{-9}) (mol) \approx 0.46 \mu g. \quad (4)$$

140 This means that 0.46  $\mu g$  of lipids were required for full coverage of the EG including the  
141 PDMS wall and the SiO<sub>2</sub> surface. Considering that the mass of the lipid in solution was 0.1  $\mu g$  for  
142 every drop, the observed saturation after five lipid injections (markers 2 to 6 in main manuscript  
143 Fig. 2b) seems reasonable amount for the full coverage of the EG surface. Additional casting of  
144 lipid molecules (marker 7 in the main manuscript Fig. 2b) confirms that 5 times of lipid  
145 introduction was sufficient for the complete passivation of the EG surface.

146

147 **Supplementary Note 6. Langmuir–Nernst isotherm model considering nonspecific bindings**

148

149 The SLB allows covering the EG surface, and thereby prohibit the nonspecific binding of  
150 analytes to the EG surface. To investigate and quantify the role of SLB as the ‘suppressor’ for the  
151 nonspecific binding, we conducted an experiment with the EG functionalized by sulfo-NHS-biotin  
152 and compared this with the isotherm analysis of the SLB-FET (main manuscript Fig. 3d). The  
153 Langmuir–Nernst isotherm model is described as follows:

155 
$$\Delta V_{TG}([A]) = \frac{q_A}{C_{TG}} [B]_{\max} \frac{[A]}{[A] + K_{eq}} + k_N [A] \quad (5)$$

154 where  $K_{eq}$ , and  $k_N$  stand for equilibrium constant and nonspecific binding constant, respectively<sup>3</sup>.

156 The strong suppression of nonspecific binding in our SLB-FET is described in the main  
157 manuscript in Fig. 3d. The measured result (circles in orange in main manuscript Fig. 3d) from our  
158 SLB-FET is highly consistent with the conventional Langmuir isotherm model (solid orange line  
159 in main manuscript Fig. 3d,  $k_N[A] = 0$ ). Biotin–avidin binding signals measured with the sulfo-  
160 NHS-biotin functionalized EG (circles in grey in main manuscript Fig. 3d) exhibited strong  
161 agreement with the Langmuir–Nernst isotherm (solid grey line in main manuscript Fig. 3d). From  
162 the fitting,  $k_N$  and  $K_{eq}$  were calculated to be  $3.685 \pm 0.754$  mV/ $\mu$ M·m and 54.2 fM, respectively,  
163 which was within the reasonable range<sup>4</sup>. Note that our SLB-FET platform allowed for negligence  
164 of the second term, whereas protein bindings without SLB should take into account the possibility  
165 of nonspecific binding.

166 **Supplementary Note 7. Sensing mechanism and analytical models**

167

168 Molecular detection using FETs is based on conductivity changes in response to variance in  
169 the gate potential. In our case, using an n-type channel for FET and applying a positive gate voltage  
170 leads to accumulation of carriers. When analytes bind to receptors on the SLB, the charge density  
171 variation in the SiO<sub>2</sub> layer changes the top gate voltage, and eventually the conductance in the FET.  
172 The time-dependent top gate voltage induced by adsorbed molecules is described by  
173 Supplementary Eq. 6,

174 
$$\frac{d\Delta V_{\text{TG}}(t)}{dt} = \frac{q_A}{C_{\text{TG}}} [AB] \quad (6)$$

175 where  $[AB]$  is the density of an adsorbed analyte.

176 In general, the binding kinetics of the receptor when capturing an analyte in solution can be  
177 described as follows:

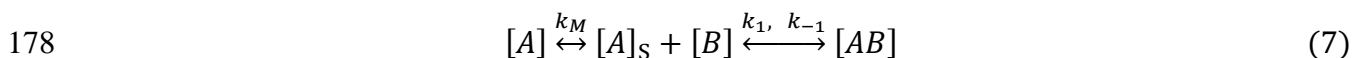

179 where  $k_M$  is a diffusion-limiting rate constant,  $k_1$  and  $k_{-1}$  are association and dissociation rate  
180 constants, respectively, and  $[A]_s$  is the surface concentration of an analyte<sup>5</sup>. We assumed the fast  
181 mixing model ( $[A]_s = [A]$ ) to describe our SLB-FET system, because the  $k_1$  in the biotin–avidin  
182 reaction ( $10^5$  to  $10^7$  M<sup>-1</sup>s<sup>-1</sup>) is two or more orders of magnitude smaller than the  $k_M$  ( $\sim 10^9$  M<sup>-1</sup>s<sup>-1</sup>)  
183 for diffusion limited reactions<sup>6</sup>. In other words, we suppose that the analyte concentration at the  
184 surface remains almost the same as in the bulk in the following analysis. With this, the reaction  
185 can be described in a simpler fashion by the first order Langmuir equation (Supplementary Eq. 8a).

186 
$$\frac{d[AB]}{dt} = k_1[A]([B]_{\text{max}} - [AB]) + k_{-1}[AB] \quad (8a)$$

187 Then, the density of the adsorbed analyte is explicitly expressed by Supplementary Eq. 8b.

188  $[AB]_t = \frac{k_1[B]_{\max}[A]}{k_1[A] + k_{-1}} (1 - e^{-(k_1[A]+k_{-1})t}) = [B]_{\max} \frac{[A]}{[A] + K_{\text{eq}}} (1 - e^{-(k_1[A]+k_{-1})t})$  (8b)

189 By combining Eqs. 6 and 8b, the time-dependent voltage variation is described by  
 190 Supplementary Eq. 9,

191 
$$\Delta V_{\text{TG\_adsorption}}(t) = \frac{q_A}{C_{\text{TG}}} [B]_{\max} (1 - e^{-(k_1[A]+k_{-1})t})$$
 (9)

192 In our measurements, the target analyte in solution is dropped in the reaction chamber;  
 193 therefore, this inevitably leads to a sudden increase in the ionic concentration in the outer buffer.  
 194 Thus, the top gate potential should reflect relaxation behavior via thermal diffusion. We model its  
 195 transient state towards equilibrium by a resistor–capacitor (RC) circuit model as in Supplementary  
 196 Eq. 10.

197 
$$\Delta V_{\text{TG\_RC}}(t) = \begin{cases} V_p (1 - e^{-\frac{t}{\tau_1}}) & t < T \\ V_p e^{-\frac{t}{\tau_2}} & t \geq T \end{cases}$$
 (10)

198 where the peak voltage  $V_p$  is the difference between  $q_A[B]_{\max}/C_{\text{TG}}$  and the maximum value of  
 199  $\Delta V_{\text{TG}}(t)$ ,  $\tau_1$  and  $\tau_2$  are RC time constants, and  $T$  is an effective duration for the sudden increase in  
 200 the ionic concentration in the outer buffer.

201 Finally, the measured signal should be the superposition of these responses described above  
 202 (Eqs. 9 and 10).

203 
$$\Delta V_{\text{TG}}(t) = \begin{cases} \frac{q_A}{C_{\text{TG}}} [B]_{\max} (1 - e^{-(k_1[A]+k_{-1})t}) + V_p (1 - e^{-\frac{t}{\tau_1}}) & t < T \\ \frac{q_A}{C_{\text{TG}}} [B]_{\max} (1 - e^{-(k_1[A]+k_{-1})t}) + V_p e^{-\frac{t}{\tau_2}} & t \geq T \end{cases}$$
 (11)

204 Supplementary Fig. 7 shows the response curve for 100 pM-avidin binding over the SLB  
 205 (DOPC:B-PE = 95:5), fitted to our suggested theory model. From these fittings, important reaction  
 206 parameters are obtained. Those parameters are summarized in Supplementary Table 1.

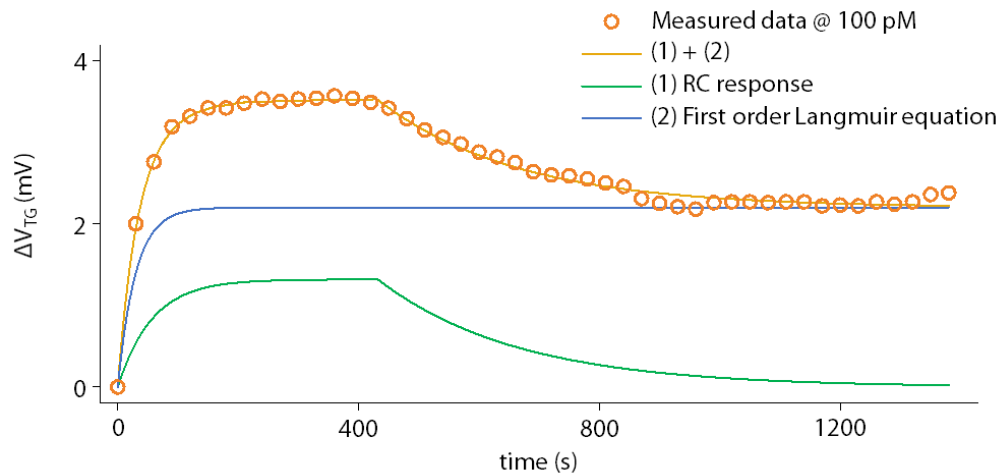

207  
 208 **Supplementary Fig. 7.** Real-time top gate voltage variation in response to 100 pM-avidin fitted  
 209 by an RC circuit model and the first order Langmuir equation.

210

211 **Supplementary Table 1. Fitting parameters in Supplementary Eq. 10**

|        | $V_p$<br>(mV) | $\tau_1$<br>(sec) | $V_{eq}$<br>(V) | $k_1$<br>( $\times 10^7 M^{-1} s^{-1}$ ) | $k_{-1}$<br>( $\times 10^{-2} s^{-1}$ ) | $\tau_2$<br>(sec) | $T$<br>(sec) |
|--------|---------------|-------------------|-----------------|------------------------------------------|-----------------------------------------|-------------------|--------------|
| 100 pM | 1.3200        | 29.682            | 0.0022          | 1.6835                                   | 1.0469                                  | 231.790           | 432.984      |
| 1 nM   | 0.7802        | 12.971            | 0.0053          | 1.6642                                   | 1.0350                                  | 106.525           | 219.648      |
| 5 nM   | -             | -                 | 0.0079          | 1.6606                                   | 1.0311                                  | -                 | -            |
| 10 nM  | -             | -                 | 0.0088          | 1.6227                                   | 1.0010                                  | -                 | -            |
| 100 nM | -             | -                 | 0.0089          | 1.7163                                   | 1.0410                                  | -                 | -            |

212

213 **Supplementary Note 8. X-ray reflectivity measurement for electron density fitting**

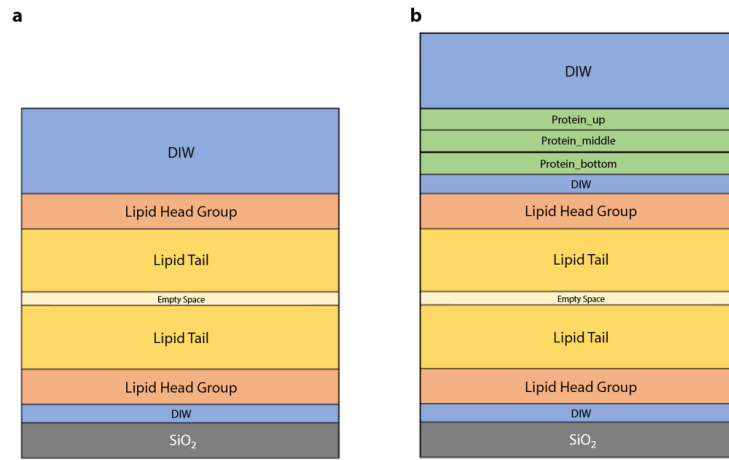

214

215 **Supplementary Fig. 8. Structure for a slab model. a**, the SLB and **b**, the SLB with a layer of  
216 avidin molecules

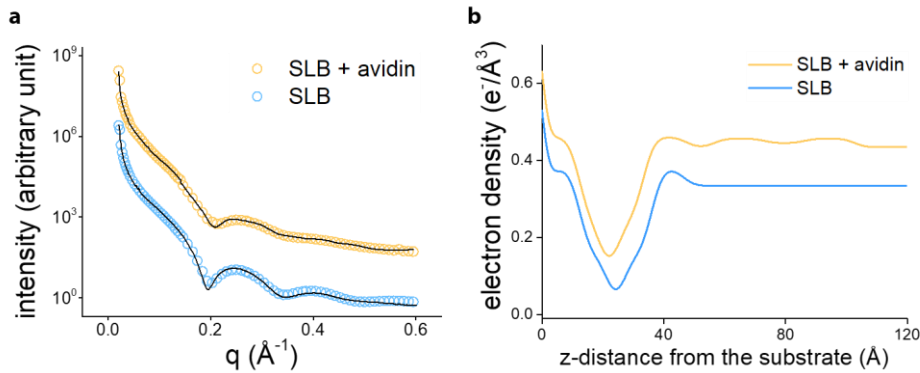

217

218 **Supplementary Fig. 9. X-ray intensities and electron density profiles of SLB (blue) and SLB**  
219 **with avidin (yellow).** **a**, X-ray reflectivity intensities and their fittings. **b**, Electron density curves  
220 along the z-direction.

221 As shown in Supplementary Fig. 9a, both measurements of ‘SLB’ and ‘SLB with avidin’  
222 were well fitted by the model described above. Slight deviation at high q regime ( $>0.5 \text{ \AA}^{-1}$ ) is due  
223 to the low peak intensity. The electron density plots in Supplementary Fig. 9b clearly exhibit the  
224 typical electron density curve of SLB, showing consistency with the literature in terms of the size  
225 of the conjugated avidin<sup>2</sup> ( $\sim 50 \text{ \AA}$ ).

226



227 **Supplementary Note 9. Chemical potential calculation using the electron density**

228

229 Poisson's equation (Supplementary Eq. 12) was applied to calculate electric potential

230 variation due to the redistribution of the charge density in the lipid membrane<sup>7, 8, 9</sup>.

231 
$$\psi(z) - \psi(0) = -\frac{1}{\epsilon_0} \int_0^z dz' \int_0^{z'} \rho(z'') dz'' \quad (12)$$

232 The chemical potential at the probing surface was calculated by integrating the charge density

233 ( $\Delta\rho = \rho_{\text{SLB}} - \rho_{\text{SLB}+\text{avidin}}$ ), and multiplied by the area of SLB film ( $\pi \times R^2 \approx 5.027 \times 10^{-5} \text{ m}^2$ ) assuming

234 in-plane homogeneity.

235 
$$\Delta\psi(z) - \Delta\psi(0)$$

236 
$$= -\frac{1}{\epsilon_0} \int_0^z \int_0^{z'} \Delta\rho(z'') dz'' dz'$$

237 
$$= -\frac{e^- \times \pi r^2}{\epsilon_0} \int_0^z \int_0^{z'} \Delta\rho(z'') dz'' dz'$$

238 
$$= -\frac{1.602 \times 10^{-19} \times 5.027 \times 10^{-5}}{8.854 \times 10^{-12}} \int_0^z \Delta E(z') - \Delta E(0) dz' = 0.697 \text{ (V)} \quad (13)$$

239 As seen in the main manuscript Fig. 4d, the obtained signal mainly originates from the charge

240 density change in proximity of the probing surface because the chemical potential is inversely

241 proportional to the distance squared.

242 **Supplementary Table 2. Electric parameters of FET-SLB circuit components**

|                                      | $C_{\text{EG}}$ | $C_{\text{TG}}$ | $C_{\text{BG}}$ | $C_{\text{SLB}}$ |
|--------------------------------------|-----------------|-----------------|-----------------|------------------|
| Dielectric constant ( $\epsilon_r$ ) | 3.9             | 3.9             | 3.9             | 1.9              |
| Area ( $\text{m}^2$ )                | 5.03E-05        | 1.50E-10        | 1.50E-10        | 5.03E-05         |
| thickness (m)                        | 8.00E-08        | 1.50E-08        | 7.50E-07        | 5.00E-09         |
| Capacitance (F)                      | 2.17E-08        | 3.45E-13        | 6.91E-15        | 4.36E-06         |
| Voltage (V)                          | 2.18E-07        | 1.37E-02        | 6.83E-01        | 1.08E-09         |

243 **Supplementary Note 10. Comparison of lipid membranes on a hydrophilic polymer layer vs**  
244 **a SiO<sub>2</sub> layer**

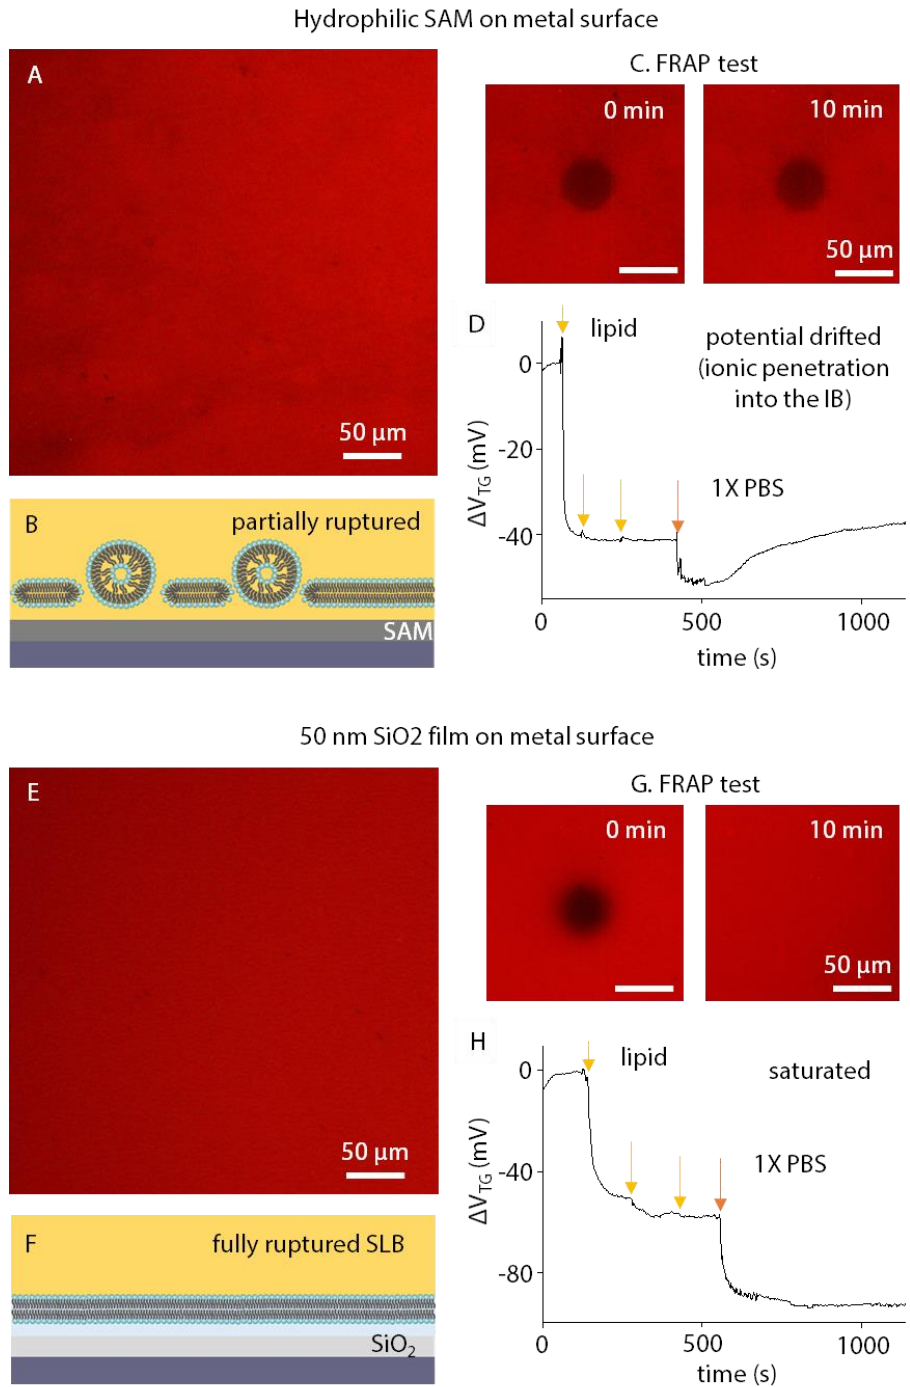

245  
246 **Supplementary Fig. 10. Direct comparison of lipid membrane over the hydrophilic polymer**  
247 **vs the SiO<sub>2</sub> layer. a, Non-uniform FL distribution of supported lipid membrane on the hydrophilic**

248 polymer (2-Mercaptoethanol) on the EG. **b**, corresponding schematic illustration. **c**, Partial  
249 immobility of lipid compositions during a FRAP test. Albeit become brighter, the circular FL  
250 bleached area does completely recovered in 10 min. **d**, Time-dependent  $\Delta V_{TG}$  after the outer buffer  
251 exchange (DIW  $\rightarrow$  1 $\times$  PBS) showing the leakage flow of ions through the pin-hole of the lipid  
252 membrane. **e**, **f**, Uniform SLB formation over the 50-nm-SiO<sub>2</sub> layer (e) with a schematic  
253 illustration (f). **g**, FRAP test showing later fluidity of the composing lipids. Note that the FL  
254 bleached (black) region disappeared within 10 min. **h**, Time-lapse  $\Delta V_{TG}$  variation after the OB  
255 exchange (DIW  $\rightarrow$  1 $\times$  PBS). The  $\Delta V_{TG}$  was saturated after the ionic contrast between IB (DIW)  
256 and OB (1 $\times$  PBS) was obtained.

257  
258 This is the major reason why we prepared the SLB on the SiO<sub>2</sub> film. Although mass production of  
259 biosensors using polymeric SAM seems far-fetched, our suggested SLB-FET with the SiO<sub>2</sub> film  
260 on the EG guarantees the robust formation of the SLB in terms of coverage (Supplementary Fig.  
261 10e) and lipid mobility (Supplementary Fig. 10g). Most importantly, stable OB exchange  
262 manifests the importance of the defect-free SLB. This allows reliable molecular detection with  
263 high reproducibility in real time (Supplementary Fig. 10h).

264 **Supplementary Note 11. Molecular dynamics (MD) simulation for investigating the**  
 265 **conformational change**

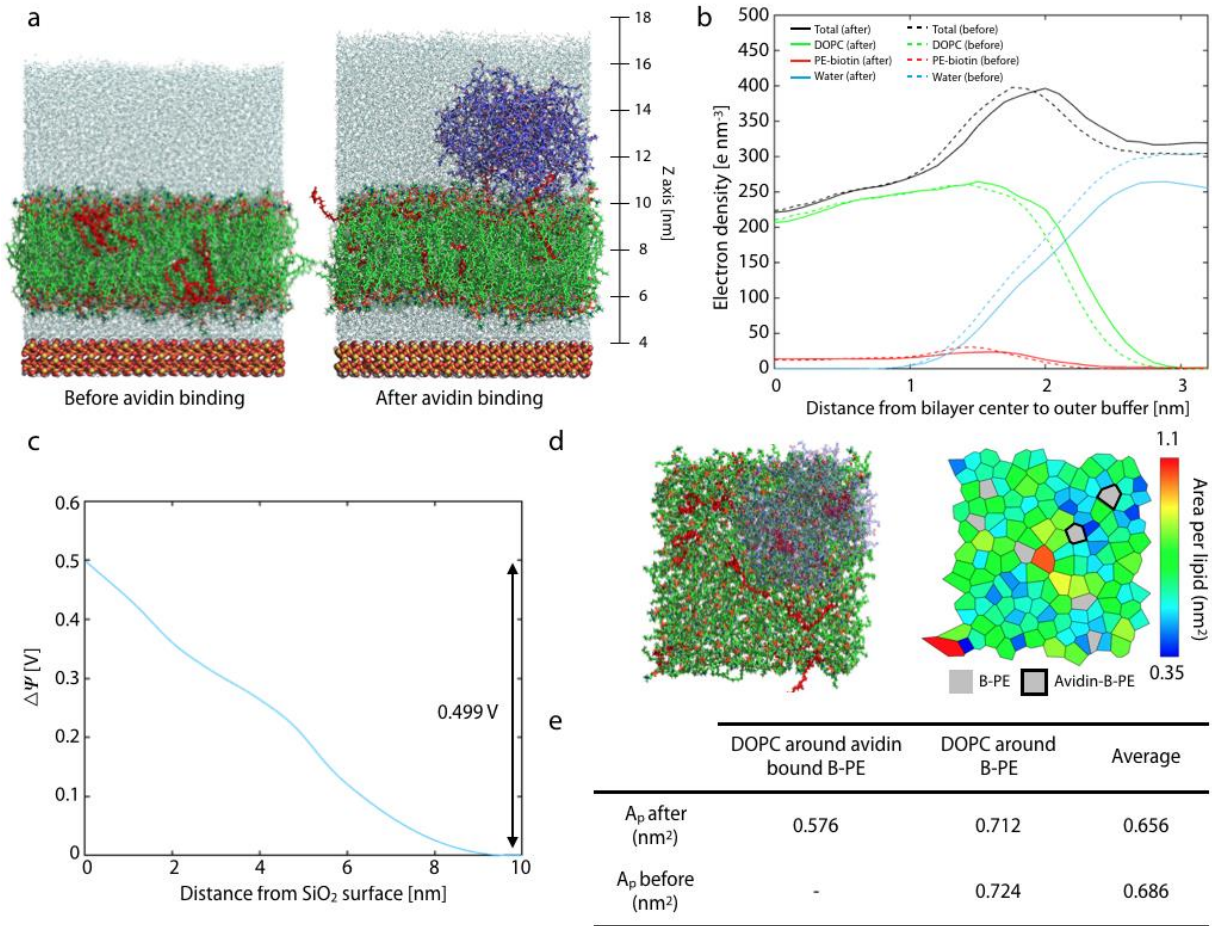

266

267 **Supplementary Fig. 11. MD simulation on electron density and conformational change in the**

268 **SLB membrane (DOPC:B-PE=95:5) upon biotin-avidin binding. a.** Final configurations of the

269 SLB before (left) and after (right) avidin binding. The DOPC lipids, B-PE lipids, avidin, and water

270 molecules are represented by the green, red, purple, and cyan colours, respectively. The SiO<sub>2</sub>

271 surface are represented by red (O atoms) and yellow (Si atoms) spheres. **b.** Electron density profiles

272 of the upper leaflet in the membrane before and after biotin-avidin bindings. **c.** Potential difference

273 ( $\Delta\psi$ ) upon biotin-avidin binding calculated by Poisson's equation. **d.** Top view of avidin-bound

274 membrane and corresponding area per lipid calculated by Voronoi analysis. **e.** Chart for calculated

275 areas per lipid for constituent lipids.

276 Supplementary Fig. 11 shows the obtained simulation results for the final configurations of binary  
277 lipid membrane (DOPC:B-PE=95:5) upon avidin binding events under a symmetrical ionic  
278 condition across the lipid bilayer (DIW for both of IB and OB). We then calculated the electron  
279 density profile of lipids to investigate whether the avidin-biotin binding event can modulate the  
280 profiles of the lipid membrane. The electron density profile achieved from the centre of the lipid  
281 membrane shows that the maximum peak of electron density at the upper leaflet of the lipid bilayer  
282 shifts toward a higher value of  $z$  after avidin binding, indicating slight thickening of the lipid  
283 bilayer (Supplementary Fig. 11b). For quantitative comparison with experimental results, the  
284 potential difference,  $\Delta\psi$ , via the avidin binding was calculated using Poisson's equation  
285 (Supplementary Fig. 11c). As a result, the avidin bound membrane induced chemical potential  
286 change of  $\Delta\psi = 499$  mV at the surface of the  $\text{SiO}_2$  layer. This agrees very well with the  
287 experimental results shown in main Fig. 4d. We further measured the structural characteristic of  
288 the lipid bilayer, the area per lipid,  $A_p$ , to quantify the conformational change of the membrane  
289 upon avidin binding. Top view of the avidin bound DOPC/B-PE membrane and corresponding  
290 Voronoi cells represented for DOPC and B-PE are shown in Supplementary Fig. 11d. This shows  
291 in-plane ( $x$ - $y$  plane) compression of lipid membrane when two biotins bound for two binding sites  
292 of an avidin (indicated as 'Avidin-B-PE', Supplementary Fig. 11d). The color map analyzed in the  
293 Voronoi cell (Supplementary Fig. 11d) and corresponding data in area per lipid (Supplementary  
294 Fig. 11e) clearly indicate that avidin bound B-PEs become the seed spots causing the membrane  
295 packing effect (a decreased area per lipid). Successive decrease of the area per lipid around the  
296 avidin bound B-PE accompanies the thickening effect over the lipid membrane, which results in a  
297 potential decrease of the  $\text{SiO}_2$  surface. Considering that the packing density is one of the essential  
298 criteria in defining the modulation of the lipid membrane during the avidin binding, the MD

299 simulation results with DOPC/B-PE lipid mixtures shows great correspondence with the electron  
 300 density profiles obtained from XRR.

301

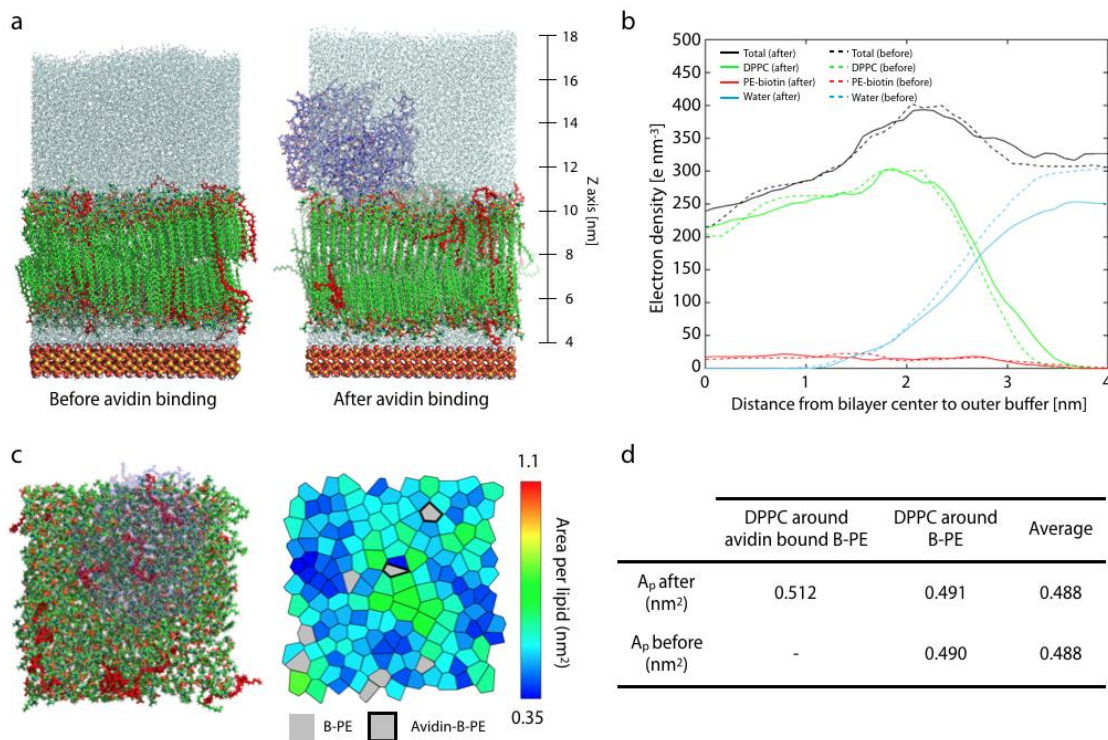

302

303 **Supplementary Fig. 12. MD simulation on electron density and conformational change in the**

304 **SLB (DPPC:B-PE=95:5) upon biotin-avidin binding. a.** Final configurations of the SLB before

305 (left) and after (right) avidin binding. The DPPC lipids, B-PE lipids, avidin, and water molecules

306 are represented by the green, red, purple, and cyan colours, respectively. The  $\text{SiO}_2$  surface are

307 represented by red (O atoms) and yellow (Si atoms) spheres. **b.** Electron density profiles of the

308 upper leaflet in the membrane before and after biotin-avidin bindings. **c.** Top view of the avidin-

309 bound membrane and corresponding area per lipid calculated by Voronoi analysis. **d.** Chart for

310 calculated areas per lipid for constituent lipids.

311

312 Supplementary Fig. 12a shows the final configurations of the DPPC lipid mixed with B-PE  
313 (DPPC:B-PE=95:5) before and after the avidin binding. In contrast to the membrane with the  
314 mobile DOPC lipid, the stiffer and more crystalized DPPC with B-PE shows a negligible effect on  
315 the modulation of the electron density profile (Supplementary Fig. 12b). Top view of the avidin  
316 bound DPPC/B-PE membrane, and corresponding Voronoi cells represented the area per lipid,  $A_p$ ,  
317 for DPPC and B-PE are shown in Supplementary Fig. 12c. The area per lipid calculated from the  
318 Voronoi cells represents that negligible conformational change of the lipid membrane was  
319 observed in the binary DPPC/B-PE membrane after avidin binding (Supplementary Fig. 12d). In  
320 summary, insignificant physicochemical modulation was observed in the DPPC/B-PE under  
321 avidin binding.

322

323 **Supplementary References**

324

325 1. Y. S. Ryu *et al.*, Kinetics of lipid raft formation at lipid monolayer-bilayer junction probed  
326 by surface plasmon resonance. *Biosens. Bioelectron.* **142**, 111568 (2019).

327 2. N. Kucerka, S. Tristram-Nagle, J. F. Nagle, Structure of fully hydrated fluid phase lipid  
328 bilayers with monounsaturated chains. *J. Membrane Biol.* **208**, 193-202 (2005).

329 3. L. Maletinska *et al.*, Human glioblastoma cell lines: Levels of low-density lipoprotein  
330 receptor and low-density lipoprotein receptor-related protein. *Cancer Res.* **60**, 2300-2303  
331 (2000).

332 4. R. A. Kohanski, M. D. Lane, Monovalent avidin affinity columns. *Methods Enzymol.* **184**,  
333 194-200 (1990).

334 5. X. Duan *et al.*, Quantification of the affinities and kinetics of protein interactions using  
335 silicon nanowire biosensors. *Nat. Nanotechnol.* **7**, 401-407 (2012).

336 6. R. F. Delgadillo *et al.*, Detailed characterization of the solution kinetics and  
337 thermodynamics of biotin, biocytin and HABA binding to avidin and streptavidin. *PLoS*  
338 *One* **14**, e0204194–e0204194 (2019).

339 7. I. D. Mayergoyz, Solution of the nonlinear Poisson equation of semiconductor-device  
340 theory. *J. Appl. Phys.* **59**, 195-199 (1986).

341 8. H. J. Shen *et al.*, Molecular dynamics simulations of ether- and ester-linked phospholipid  
342 Bilayers: A comparative study of water models. *J. Phys. Chem. B* **122**, 9399-9408 (2018).

343 9. K. E. Forsten, R. E. Kozack, D. A. Lauffenburger, S. Subramaniam, Numerical solution of  
344 the nonlinear Poisson-Boltzmann equation for a membrane-electrolyte system. *J. Phys.*  
345 *Chem.* **98**, 5580-5586 (1994).

346
